# Supplementary material for: Evaluation of leaf-level optical properties employed in land surface models – example with CLM 5.0
Source: Copernicus journal article supplement (doi:10.5194/gmd-2019-59), 2019-05-20
Supplement: Supplementary file 1 [file gmd-2019-59-supplement.zip]

**Table S1. Revised optical properties table following CLM PFT-definition. Leaf angle shows deviation from spherical ( $\chi_L$ ). This table shows values for variables for which data were available. Note, the values are obtained as an average across species values (S2). Transmittance of grasses is set based on crop transmittance. Crop  $\chi_L$  is calculated as an average across all crop species means (S3). Note, VIS= 400-700 nm and NIR = 701-2400 nm. Note, 'BDT(/S)' denotes 'BDT+BDS'.**

| Plant Functional Type (PFT)                                                                                                      | $\chi_L$ | R (leaf, VIS) | R (leaf, NIR) | R (stem, VIS) | R (stem, NIR) | T (leaf, VIS) | T (leaf, NIR) | T (stem, VIS) | T (stem, NIR) |
|----------------------------------------------------------------------------------------------------------------------------------|----------|---------------|---------------|---------------|---------------|---------------|---------------|---------------|---------------|
| NET temperate;<br>NET boreal                                                                                                     | -        | 0.09          | 0.41          | 0.12          | 0.36          | 0.04          | 0.32          |               |               |
| BET tropical;<br>BET(/S) temperate                                                                                               | 0.32     | 0.11          | 0.46          | 0.21          | 0.49          | 0.06          | 0.33          |               |               |
| NDT boreal                                                                                                                       | -        | 0.08          | 0.39          | 0.12          | 0.36          | 0.06          | 0.42          |               |               |
| BDT tropical                                                                                                                     | 0.2      | 0.08          | 0.41          | 0.21          | 0.49          | 0.06          | 0.43          |               |               |
| BDT(/S) temperate;<br>BDT(/S) boreal                                                                                             | 0.57     | 0.08          | 0.41          | 0.21          | 0.49          | 0.06          | 0.43          |               |               |
| C3 arctic grass<br>C3 grass;<br>C4 grass                                                                                         | -0.23    | 0.05          | 0.28          |               |               | 0.05          | 0.40          |               |               |
| C3 crop;<br>Temp corn;<br>Spring wheat;<br>Temp soybean;<br>Cotton;<br>Rice;<br>Sugarcane;<br>Tropical corn;<br>Tropical soybean | 0.34     | 0.08          | 0.42          |               |               | 0.05          | 0.40          |               |               |
